# Supplementary material for: Revisiting the chlorophyll biosynthesis pathway using genome scale metabolic model of Oryza sativa japonica
Source: PubMed Central journal article supplement (PMC4595741; doi:10.1038/srep14975), 2015-10-07
Supplement: srep14975-s1.pdf [file srep14975-s1.pdf]

**Revisiting the chlorophyll biosynthesis pathway using genome scale metabolic model of *Oryza sativa japonica***

**Authors:**

**First Author:** Ankita Chatterjee

Academic Affiliation: Department of Biophysics, Molecular Biology and Bioinformatics; University of Calcutta

Address: 92, APC Road

City: Kolkata

Country: India

Postal Code: 700009

Email address: bioinfo.ankita21@gmail.com

**Corresponding Author:** Sudip Kundu\*

Academic Affiliation: 1. Department of Biophysics, Molecular Biology and Bioinformatics; University of Calcutta

2. Center of Excellence in Systems Biology and Biomedical Engineering, TEQIP Phase-II, University of Calcutta

Address: 92, APC Road

City: Kolkata

Country: India

Postal Code: 700009

Email address: skbmbg@caluniv.ac.in

Telephone: +91-033-2350-8386

**Table S1.** List of reactions found to be non-plant and hence deleted from the model

| Reactions deleted from the model     | EC No.                                                    |
|--------------------------------------|-----------------------------------------------------------|
| RXN-7774                             | 4.1.1.71                                                  |
| GLUCONATE-5-DEHYDROGENASE-RXN-(NADP) | 1.1.1.69                                                  |
| GLUCONATE-5-DEHYDROGENASE-RXN-(NAD)  | 1.1.1.69                                                  |
| NMNAMIDOHYDRO-RXN                    | 3.5.1.42                                                  |
| NAD-SYNTH-NH3-RXN                    | 6.3.1.5                                                   |
| BUTYRATE-KINASE-RXN                  | 2.7.2.7                                                   |
| PHOSPHATE-BUTYRYLTRANSFERASE-RXN     | 2.3.1.19                                                  |
| HYPXPRIBOSYLTRAN-RXN                 | #EC no. Not found #no data found for occurrence in plants |
| GMP-SYN-NH3-RXN                      |                                                           |
| GUANINE-DEAMINASE-RXN                | 3.5.4.3                                                   |
| DEOXYGLUCONOKIN-RXN                  | 2.7.1.45                                                  |
| RXN-1981                             | 4.2.99.21                                                 |
| GLUCONOLACT-RXN                      | 3.1.1.17                                                  |
| KDPGALDOL-RXN                        | 4.1.2.14                                                  |
| GLUCOSE-1-DEHYDROGENASE-RXN-(NADP)   | 1.1.1.47                                                  |
| PPGPPHYDRO-RXN                       | 3.6.1.40                                                  |
| GTPPYPHOSKIN-RXN                     | 2.7.6.5                                                   |
| PPGPPSYN-RXN                         | 3.1.7.2                                                   |
| ORNITHINE-CYCLODEAMINASE-RXN         | 4.3.1.12                                                  |

|                                              |            |
|----------------------------------------------|------------|
| CYSTEINE-DIOXYGENASE-RXN                     | 1.13.11.20 |
| RXN-974                                      | no info    |
| DUTP-PYROP-RXN                               | 3.6.1.19   |
| DEOXYINOPHOSPHOR-RXN                         | 2.4.2.1    |
| DEOXYRIBOSE-P-ALD-RXN                        | 4.1.2.4    |
| R13-RXN                                      | 3.5.4.8    |
| D-PPENTOMUT-RXN                              | 5.4.2.7    |
| AICARSYN-RXN                                 | 4.3.2.2    |
| GLYCINE-FORMIMINOTRANSFERASE-RXN             | 2.1.2.4    |
| R63-RXN                                      | 3.5.2.-    |
| AIRCARBOXY-RXN                               | 4.1.1.21   |
| R128-RXN                                     | 3.5.1.-    |
| R127-RXN                                     | no info    |
| R62-RXN                                      | no info    |
| IMPCYCLOHYDROLASE-RXN                        | 3.5.4.10   |
| 4-DIAMINOPENTANOATE-DEHYDROGENASE-RXN-(NAD)  | 1.4.1.12   |
| ARGININE-2-MONOOXYGENASE-RXN                 | 1.13.12.1  |
| 4-DIAMINOPENTANOATE-DEHYDROGENASE-RXN-(NADP) | 1.4.1.12   |
| ACETYLORNDEACET-RXN                          | 3.5.1.16   |
| GUANIDINOBUTYRASE-RXN                        | 3.5.3.7    |
| RXN-22                                       | 4.3.2.1    |
| PYRUVOXID-RXN                                | 1.2.5.1    |

|                                          |          |
|------------------------------------------|----------|
| RXN-8089                                 | 1.2.3.9  |
| CYSTATHIONINE-BETA-SYNTHASE-RXN          | 4.2.1.22 |
| TREHALA-RXN                              | 3.2.1.28 |
| PYRUFLAVREDUCT-RXN                       | 1.2.7.1  |
| R11-RXN                                  | 2.8.3.8  |
| ACETALD-DEHYDROG-RXN                     | 1.2.1.10 |
| HOMOSERINE-O-ACETYLTRANSFERASE-RXN       | 2.3.1.31 |
| THREONINE-ALDOLASE-RXN                   | 4.1.2.5  |
| AICARTRANSFORM-RXN                       | 2.1.2.3  |
| RXN-9                                    | 2.1.3.3  |
| RXN-10                                   | 6.3.4.5  |
| RXN-34                                   | 3.5.3.1  |
| CITRULLINASE-RXN                         | 3.5.1.20 |
| MYO-INOSITOL-1(OR-4)-MONOPHOSPHATASE-RXN | 3.1.3.25 |

---

**Table S2.** (a) Detail of all the reactions and transporters involved in one of the possible chlorophyll synthesis pathways.

| Reaction Name            | Reaction                                                                         |
|--------------------------|----------------------------------------------------------------------------------|
| mit_AconDHatase          | 1.0 Citrate <> 1.0 CisAconitate                                                  |
| chl_FPPSYNRXN            | 1.0 GERANYL-PP_str + 1.0 delta(3)-isopentenyl-pp_str -> 1.0 FARNESYL-PP_str +    |
| chl_PROTOPORGENOXIRXN    | 2.0 PROTOPORPHYRINOGEN_str + 3.0 O2_str -> 2.0 PROTOPORPHYRIN_IX_str             |
| chl_UROGENIIISYNRXN      | 1.0 HYDROXYMETHYLBILANE_str -> 1.0 UROPORPHYRINOGEN-III_str                      |
| 1.5.1.20-RXN-(NADP)      | 1.0 NADP + 1.0 5-METHYL-THF <> 1.0 NADPH + 1.0 METHYLENE-THF                     |
| chl_PYR_tx               | 1.0 PYRUVATE <> 1.0 PYR_str                                                      |
| ACETATE--COA-LIGASE-RXN  | 1.0 CO-A + 1.0 ATP + 1.0 ACET -> 1.0 AMP + 1.0 PPI + 1.0 ACETYL-COA              |
| chl_CDPKINRXN            | 1.0 ATP_str + 1.0 CDP_str -> 1.0 ADP_str + 1.0 CTP_str                           |
| chl_GAP_tx               | 1.0 Pi_str + 1.0 GAP <> 1.0 Pi + 1.0 GAP_str                                     |
| chl_OHMETHYLBILANESYNRXN | 4.0 PORPHOBILINOGEN_str -> 1.0 HYDROXYMETHYLBILANE_str + 4.0 AMMO                |
| PEPDEPHOS-RXN            | 1.0 PHOSPHO-ENOL-PYRUVATE + 1.0 ADP -> 1.0 PYRUVATE + 1.0 ATP                    |
| chl_LightNonCyc          | 4.5 ADP_str + 3.5 NADP_str + 14.0 Photon + 4.5 Pi_str -> 4.5 ATP_str + 3.5 NADPH |
| chl_CO2_tx               | 1.0 CARBON-DIOXIDE -> 1.0 CO2_str                                                |
| chl_RXN1F72              | 1.0 DIVINYL-PROTOCHLOROPHYLLIDE-A_str + 1.0 NADPH_str -> 1.0 MONO-'              |
| ADENYL-KIN-RXN           | 1.0 AMP + 1.0 ATP <> 2.0 ADP                                                     |
| CO2_tx                   | 1 x_CO2 <> 1 CARBON-DIOXIDE                                                      |
| chl_LightCyc             | 6.0 ADP_str + 14.0 Photon + 6.0 Pi_str -> 6.0 ATP_str                            |
| O2_tx                    | 1 x_O2 <> 1 OXYGEN-MOLECULE                                                      |
| chl_G3Pdh                | 1.0 BPGA_str + 1.0 NADPH_str <> 1.0 NADP_str + 1.0 GAP_str + 1.0 Pi_str          |
| chl_PyrNADPH             | 1.0 NADPH_str + 1.0 PYR_str + 1.0 CO2_str -> 1.0 NADP_str + 1.0 MAL_str          |
| INORGPYROPHOSPHAT-RXN    | 1.0 PPI -> 2.0 Pi                                                                |
| mit_Complex_III          | 1.0 QH2 + 2.0 Cyt_ox + 2.0 Proton -> 1.0 Q + 2.0 Cyt_red                         |
| chl_RXN0882              | 1.0 NADP_str + 1.0 HYDROXY-METHYL-BUTENYL-DIP_str <> 1.0 NADPH_str +             |
| mit_IsoCitDH             | 1.0 NAD_mit + 1.0 IsoCitrate -> 1.0 NAD_mitH + 1.0 mit_CO2 + 1.0 AlphaKG + 2.0   |
| RXN0-5114                | 1.0 3-P-SERINE <> 1.0 Pi + 1.0 SER                                               |
| chl_X5Piso               | 1.0 X5P_str <> 1.0 Ru5P_str                                                      |
| chl_RXN1F66              | 1.0 PHYTYL-PYROPHOSPHATE_str + 1.0 CHLOROPHYLLIDE-A_str -> 1.0 CHL               |
| RXN66-3                  | 1.0 NAD + 1.0 ACETALD -> 1.0 NADH + 1.0 ACET                                     |

---

|                                |                                                                                |
|--------------------------------|--------------------------------------------------------------------------------|
| chl_Ru5Pk                      | 1.0 ATP_str + 1.0 Ru5P_str -> 1.0 RuBP_str + 1.0 ADP_str                       |
| chl_MalGLT_tx                  | 1.0 GLT + 1.0 MAL_str <> 1.0 GLT_str + 1.0 MAL                                 |
| chl_TPI                        | 1.0 GAP_str <> 1.0 DHAP_str                                                    |
| mit_Cit_tx                     | 1.0 CIT <> 1.0 Citrate                                                         |
| chl_R5Piso                     | 1.0 R5P_str <> 1.0 Ru5P_str                                                    |
| CHL_A_tx                       | x_CHLOROPHYLLA <> 1 CHLOROPHYLL-A_str                                          |
| MALATE-DEH-RXN                 | 1.0 MAL + 1.0 NAD <> 1.0 NADH + 1.0 OXALACETIC_ACID                            |
| chl_RXN0302                    | 1.0 2-PHOSPHO-4-CYTIDINE-5-DIPHOSPHO-2-C-MET_str <> 1.0 CMP_str + 1.0 C        |
| PSERTRANSAM-RXN                | 1.0 3-P-SERINE + 1.0 2-KETOGLUTARATE <> 1.0 3-P-HYDROXYPYRUVATE +              |
| chl_Eno                        | 1.0 PGA2_str <> 1.0 PEP_str                                                    |
| mit_SER_tx                     | 1.0 SER <> 1.0 mit_SER                                                         |
| chl_UROGENDECARBOXRXN          | 1.0 UROPORPHYRINOGEN-III_str -> 1.0 COPROPORPHYRINOGEN_III_str + 4.0           |
| mit_O2_tx                      | 1.0 OXYGEN-MOLECULE <> 1.0 mit_O2                                              |
| chl_DXS_RXN                    | 1.0 GAP_str + 1.0 PYR_str -> 1.0 DEOXYXYLULOSE-5P_str + 1.0 CO2_str            |
| chl_PPase                      | 1.0 PPI_str -> 2.0 Pi_str                                                      |
| chl_RXN1F10                    | 1.0 MONO-VINYL-PROTOCHLOROPHYLLIDE-A_str + 1.0 NADPH_str -> 1.0 NA             |
| chl_PGlyM                      | 1.0 PGA_str <> 1.0 PGA2_str                                                    |
| ATP-CITRATE-(PRO-S-)-LYASE-RXN | 1.0 Pi + 1.0 OXALACETIC_ACID + 1.0 ACETYL-COA + 1.0 ADP -> 1.0 CO-A + 1.       |
| chl_61118RXN                   | 1.0 GLT-tRNAs_str + 1.0 ATP_str + 1.0 GLT_str -> 1.0 AMP_str + 1.0 Charged-GLT |
| mit_GCVMULTI                   | 1.0 NAD_mit + 1.0 mit_GLY + 1.0 mit_THF -> 1.0 NAD_mitH + 1.0 mit_CO2 + 1.0    |
| chl_GLUTRNAREDUCTRXN           | 1.0 GLT-tRNAs_str + 1.0 NADP_str + 1.0 GLUTAMATE-1-SEMIALDEHYDE_str <          |
| chl_GLUTAMATESYN               | 1.0 2-KETOGLUTARATE_str + 1.0 NADPH_str + 1.0 GLN_str -> 1.0 NADP_str + 2      |
| mit_AconHydr                   | 1.0 CisAconitate <> 1.0 IsoCitrate                                             |
| chl_RXN7660                    | 1.0 NADPH_str + 1.0 CPD-7003_str <> 1.0 PHYTYL-PYROPHOSPHATE_str + 1.0         |
| chl_PORPHOBILSYNTHRXN          | 2.0 5-AMINO-LEVULINATE_str -> 1.0 PORPHOBILINOGEN_str                          |
| chl_GSAAMINOTRANSRXN           | 1.0 GLUTAMATE-1-SEMIALDEHYDE_str <> 1.0 5-AMINO-LEVULINATE_str                 |
| T2                             | 1.0 ADENOSYL-HOMO-CYS_str <> 1.0 ADENOSYL-HOMO-CYS                             |
| T1                             | 1.0 S-ADENOSYLMETHIONINE <> 1.0 S-ADENOSYLMETHIONINE_str                       |
| chl_TKL1                       | 1.0 GAP_str + 1.0 F6P_str <> 1.0 X5P_str + 1.0 E4P_str                         |
| chl_TKL2                       | 1.0 S7P_str + 1.0 GAP_str <> 1.0 X5P_str + 1.0 R5P_str                         |
| chl_27760RXN                   | 1.0 CTP_str + 1.0 2-C-METHYL-D-ERYTHRITOL-4-PHOSPHATE_str <> 1.0 4-CY          |
| chl_Photon_tx                  | x_Photon -> Photon                                                             |

---

---

|                                       |                                                                                |
|---------------------------------------|--------------------------------------------------------------------------------|
| chl_MalOxAc_tx                        | 1.0 OXALACETIC_ACID + 1.0 MAL_str <> 1.0 OAA_str + 1.0 MAL                     |
| PYRUVATE-DECARBOXYLASE-RXN            | 1.0 PYRUVATE -> 1.0 CARBON-DIOXIDE + 1.0 ACETALD                               |
| chl_FBPase                            | 1.0 FBP_str -> 1.0 F6P_str + 1.0 Pi_str                                        |
| HOMOCYSMETB12-RXN                     | 1.0 HOMO-CYS + 1.0 5-METHYL-THF -> 1.0 THF + 1.0 MET                           |
| chl_RXNMGPROTOPORPHYRINMETHYLESTERSYN | 1.0 S-ADENOSYLMETHIONINE_str + 1.0 MG-PROTOPORPHYRIN_str -> 1.0 MC             |
| 2PGADEHYDRAT-RXN                      | 1.0 2-PG <> 1.0 PHOSPHO-ENOL-PYRUVATE                                          |
| chl_RXN7659                           | 1.0 NADPH_str + 1.0 CPD-7002_str <> 1.0 NADP_str + 1.0 CPD-7003_str            |
| chl_RXN7658                           | 1.0 GERANYLGERANYL-PP_str + 1.0 NADPH_str <> 1.0 NADP_str + 1.0 CPD-70         |
| chl_RXN0884NADP                       | 1.0 NADPH_str + 1.0 HYDROXY-METHYL-BUTENYL-DIP_str <> 1.0 NADP_str +           |
| PGLYCDEHYDROG-RXN                     | 1.0 G3P + 1.0 NAD <> 1.0 3-P-HYDROXYPYRUVATE + 1.0 NADH                        |
| chl_CMPKIRXN                          | 1.0 ATP_str + 1.0 CMP_str <> 1.0 ADP_str + 1.0 CDP_str                         |
| GLYOHMETRANS-RXN                      | 1.0 METHYLENE-THF + 1.0 GLY <> 1.0 THF + 1.0 SER                               |
| mit_CO2_tx                            | 1.0 CARBON-DIOXIDE <> 1.0 mit_CO2                                              |
| 3PGAREARR-RXN                         | 1.0 G3P <> 1.0 2-PG                                                            |
| ADENOSINE-KINASE-RXN                  | 1.0 ATP + 1.0 ADENOSINE -> 1.0 AMP + 1.0 ADP                                   |
| chl_O2_tx                             | 1.0 OXYGEN-MOLECULE <> 1.0 O2_str                                              |
| chl_MalDH                             | 1.0 NADP_str + 1.0 MAL_str <> 1.0 OAA_str + 1.0 NADPH_str                      |
| chl_DXPREDISOMRXN                     | 1.0 NADP_str + 1.0 2-C-METHYL-D-ERYTHRITOL-4-PHOSPHATE_str <> 1.0 DE           |
| chl_PyrK                              | 1.0 ADP_str + 1.0 PEP_str -> 1.0 ATP_str + 1.0 PYR_str                         |
| chl_GLUTAMINESYN                      | 1.0 ATP_str + 1.0 GLT_str + 1.0 AMMONIA_str -> 1.0 ADP_str + 1.0 GLN_str + 1.0 |
| chl_Mal2OG_tx                         | 1.0 MAL_str + 1.0 2-KETOGLUTARATE <> 1.0 2-KETOGLUTARATE_str + 1.0 M           |
| chl_Ald1                              | 1.0 DHAP_str + 1.0 GAP_str <> 1.0 FBP_str                                      |
| chl_Ald2                              | 1.0 DHAP_str + 1.0 E4P_str <> 1.0 SBP_str                                      |
| ex_ammonia_tx                         | x_NH3 -> AMMONIA_str                                                           |
| mit_AKG_tx                            | 1.0 2-KETOGLUTARATE <> 1.0 AlphaKG                                             |
| chl_271148RXN                         | 1.0 ATP_str + 1.0 4-CYTIDINE-5-DIPHOSPHO-2-C_str <> 1.0 ADP_str + 1.0 2-PHC    |
| chl_RXN1F20                           | 1.0 ATP_str + 1.0 PROTOPORPHYRIN_IX_str -> 1.0 ADP_str + 1.0 MG-PROTOPO        |
| chl_RXN01461                          | 1.0 O2_str + 1.0 COPROPORPHYRINOGEN_III_str <> 1.0 PROTOPORPHYRINOC            |
| 1.2.1.9-RXN                           | 1.0 NADP + 1.0 GAP -> 1.0 NADPH + 1.0 G3P                                      |
| chl_FARNESYLTRANSTRANSFERASERXN       | 1.0 FARNESYL-PP_str + 1.0 delta(3)-isopentenyl-pp_str <> 1.0 GERANYLGERANY     |
| mit_GLYOHMETRANS                      | 1.0 mit_GLY + 1.0 mit_METHYLENE-THF <> 1.0 mit_THF + 1.0 mit_SER               |
| chl_SBPase                            | 1.0 SBP_str -> 1.0 S7P_str + 1.0 Pi_str                                        |

---

|                                |                                                                                   |
|--------------------------------|-----------------------------------------------------------------------------------|
| chl_ADENYLKINRXN               | 1.0 AMP_str + 1.0 ATP_str <> 2.0 ADP_str                                          |
| ADENOSYLMETHYLTRANSFERASE-RXN  | 1.0 ADENOSYL-HOMO-CYS <> 1.0 HOMO-CYS + 1.0 ADENOSINE                             |
| S-ADENOMETHIONINE-SYNTHASE-RXN | 1.0 MET + 1.0 ATP -> 1.0 PPI + 1.0 Pi + 1.0 S-ADENOSYLMETHIONINE                  |
| mit_AOX                        | 2.0 QH2 + 1.0 mit_O2 -> 2.0 Q                                                     |
| chl_PGK                        | 1.0 ATP_str + 1.0 PGA_str <> 1.0 ADP_str + 1.0 BPGA_str                           |
| chl_Rubisco                    | 1.0 RuBP_str + 1.0 CO2_str -> 2.0 PGA_str                                         |
| chl_RXN5282                    | 1.0 MG-PROTOPORPHYRIN-MONOMETHYL-ESTER_str + 1.0 NADPH_str + 1.0                  |
| chl_RXN5283                    | 1.0 NADPH_str + 1.0 O2_str + 1.0 13-HYDROXY-MAGNESIUM-PROTOPORP_str               |
| chl_RXN5284                    | 1.0 NADPH_str + 1.0 O2_str + 1.0 131-OXO-MAGNESIUM-PROTOPORPHYRIN-I               |
| mit_Complex_V                  | 1.0 Pi + 1.0 ADP -> 4.0 Proton + 1.0 ATP                                          |
| chl_GPPSYNRXN                  | 1.0 CPD-4211_str + 1.0 delta(3)-isopentenyl-pp_str -> 1.0 PPI_str + 1.0 GERANYL-P |
| chl_ISPH2RXNADP                | 1.0 NADPH_str + 1.0 HYDROXY-METHYL-BUTENYL-DIP_str <> 1.0 NADP_str +              |
| mit_ammonia_tx                 | 1.0 mit_AMMONIA -> 1.0 AMMONIA_str                                                |
| mit_Complex_I                  | 1.0 Q + 1.0 NAD_mitH + 5.0 Proton -> 1.0 QH2 + 1.0 NAD_mit                        |
| mit_Complex_IV                 | 1.0 mit_O2 + 8.0 Proton + 4.0 Cyt_red -> 4.0 Cyt_ox                               |
| mit_GLY_tx                     | 1.0 GLY <> 1.0 mit_GLY                                                            |

Chl, chloroplast; mit, mitochondria; str, stroma; tx, transporter; x\_, external

(b) The essential reactions, enzymes and genes.

| Reaction Name             | Reaction                                                                                           | Enzyme                           | EC No.   | Locus                                                      |
|---------------------------|----------------------------------------------------------------------------------------------------|----------------------------------|----------|------------------------------------------------------------|
| chl_FPPSYNRXN             | 1.0 GERANYL-PP_str + 1.0<br>delta(3)-isopentenyl-pp_str -><br>1.0 FARNESYL-PP_str + 1.0<br>PPI_str | farnesyl diphosphate<br>synthase | 2.5.1.10 | LOC_Os01g58790                                             |
| chl_PROTOPORGE<br>NOXIRXN | 2.0<br>PROTOPORPHYRINOGEN_<br>str + 3.0 O2_str -> 2.0<br>PROTOPORPHYRIN_IX_str                     | protoporphyrinogen<br>oxidase    | 1.3.3.4  | LOC_OS10G38850.1,<br>LOC_OS04G57560,LOC_Os01g18<br>320.1   |
| chl_CDPKINRXN             | 1.0 ATP_str + 1.0 CDP_str ->                                                                       | nucleoside-                      | 2.7.4.6  | LOC_Os12g36194,LOC_Os07g309<br>70,LOC_Os02g35700,LOC_Os10g |



|                 |                                                                                                                                     |                                                   |          |                                                                                                                       |
|-----------------|-------------------------------------------------------------------------------------------------------------------------------------|---------------------------------------------------|----------|-----------------------------------------------------------------------------------------------------------------------|
|                 | 1.0 ADP_str + 1.0 CTP_str                                                                                                           | diphosphate kinase                                |          | 41410,LOC_Os05g51700                                                                                                  |
| chl_OHMETHYLBI  | 4.0                                                                                                                                 | hydroxymethylbilan                                | 2.5.1.61 | LOC_Os02g07230.1                                                                                                      |
| LANESYNRXN      | PORPHOBILINOGEN_str -><br>1.0<br>HYDROXYMETHYLBILAN<br>E_str + 4.0 AMMONIA_str                                                      | e synthase                                        |          |                                                                                                                       |
| chl_LightNonCyc | 4.5 ADP_str + 3.5 NADP_str<br>+ 14.0 Photon + 4.5 Pi_str -><br>4.5 ATP_str + 3.5 NADPH_str<br>+ 1.75 O2_str                         |                                                   |          |                                                                                                                       |
| chl_RXN1F72     | 1.0 DIVINYL-<br>PROTOCHLOROPHYLLIDE<br>-A_str + 1.0 NADPH_str -><br>1.0 MONO-VINYL-<br>PROTOCHLOROPHYLLIDE<br>-A_str + 1.0 NADP_str | divinyl<br>chlorophyllide a 8-<br>vinyl-reductase | 1.3.1.75 | LOC_Os03g22780.1                                                                                                      |
| chl_G3Pdh       | 1.0 BPGA_str + 1.0<br>NADPH_str <> 1.0 NADP_str<br>+ 1.0 GAP_str + 1.0 Pi_str                                                       | glyceraldehyde-3-<br>phosphate<br>dehydrogenase   | 1.2.1.59 | LOC_Os06g45590,LOC_Os04g386<br>00,LOC_Os04g40950,LOC_Os08g<br>03290,LOC_Os02g07490,LOC_Os<br>02g38920,LOC_Os03g03720, |
| chl_PyrNADPH    | 1.0 NADPH_str + 1.0<br>PYR_str + 1.0 CO2_str -> 1.0<br>NADP_str + 1.0 MAL_str                                                       |                                                   |          |                                                                                                                       |
| chl_X5Piso      | 1.0 X5P_str <> 1.0 Ru5P_str                                                                                                         |                                                   |          |                                                                                                                       |
| chl_RXN1F66     | 1.0 PHYTYL-<br>PYROPHOSPHATE_str + 1.0<br>CHLOROPHYLLIDE-A_str -<br>> 1.0 CHLOROPHYLL-A_str<br>+ 1.0 PPI_str                        | chlorophyll<br>synthetase                         | 2.5.1.62 | LOC_OS05G28200.1                                                                                                      |

|                           |                                                                                                                                      |                                                                |          |                                                                                    |
|---------------------------|--------------------------------------------------------------------------------------------------------------------------------------|----------------------------------------------------------------|----------|------------------------------------------------------------------------------------|
| chl_RXN0882               | 1.0 NADP_str + 1.0<br>HYDROXY-METHYL-<br>BUTENYL-DIP_str <> 1.0<br>NADPH_str + 1.0 2C-METH-<br>D-ERYTHRITOL-<br>CYCLODIPHOSPHATE_str | 4-hydroxy-3-<br>methylbut-2-en-1-yl<br>diphosphate<br>synthase | 1.17.7.1 | LOC_Os02g39160.1                                                                   |
| chl_Ru5Pk                 | 1.0 ATP_str + 1.0 Ru5P_str -><br>1.0 RuBP_str + 1.0 ADP_str                                                                          | phosphoribulokinase                                            | 2.7.1.19 | LOC_Os04g21110,LOC_Os04g508<br>80,LOC_Os02g47020,LOC_Os12g<br>40880,LOC_Os08g41790 |
| chl_R5Piso                |                                                                                                                                      |                                                                |          |                                                                                    |
| chl_RXN0302               | 1.0 2-PHOSPHO-4-<br>CYTIDINE-5-DIPHOSPHO-<br>2-C-MET_str <> 1.0 CMP_str<br>+ 1.0 2C-METH-D-<br>ERYTHRITOL-<br>CYCLODIPHOSPHATE_str   | 2-C-methyl-D-<br>erythritol 2,4-<br>cyclophosphate<br>synthase | 4.6.1.12 | LOC_Os02g45660                                                                     |
| chl_UROGENDECA<br>RBOXRXN | 1.0<br>UROPORPHYRINOGEN-<br>III_str -> 1.0<br>COPROPORPHYRINOGEN_<br>III_str + 4.0 CO2_str                                           | uroporphyrinogen<br>decarboxylase                              | 4.1.1.37 | LOC_OS03G22060.1,LOC_OS03G<br>21900.1 ,LOC_OS01G43390.1                            |
| chl_DXS RXN               | 1.0 GAP_str + 1.0 PYR_str -><br>1.0 DEOXYXYLULOSE-<br>5P_str + 1.0 CO2_str                                                           | 1-deoxy-D-xylulose-<br>5-phosphate<br>synthase                 | 2.2.1.7  | LOC_Os05g33840.1,LOC_Os07g0<br>9190.1                                              |
| chl_PPase                 | 1.0 PPI_str -> 2.0 Pi_str                                                                                                            |                                                                |          |                                                                                    |
| chl_RXN1F10               | 1.0 MONO-VINYL-<br>PROTOCHLOROPHYLLIDE<br>-A_str + 1.0 NADPH_str -><br>1.0 NADP_str + 1.0<br>CHLOROPHYLLIDE-A_str                    | protochlorophyllide<br>oxidoreductase<br>(POR)                 | 1.3.1.33 | LOC_Os10g35370.1,LOC_Os04g5<br>8200.1                                              |

|                           |                                                                                                                               |                                                                   |          |                                       |
|---------------------------|-------------------------------------------------------------------------------------------------------------------------------|-------------------------------------------------------------------|----------|---------------------------------------|
| chl_61117RXN              | 1.0 tRNAGlu_str + 1.0<br>ATP_str + 1.0 GLT_str -> 1.0<br>AMP_str + 1.0 L-glutamyl-<br>tRNAGlu_str + 1.0 PPI_str               | Glutamate-tRNA<br>ligase                                          | 6.1.1.17 | LOC_Os01g09000.1,<br>LOC_Os05g08990.1 |
| chl_GLUTRNARED<br>UCTRXN  | 1.0 L-glutamyl-tRNAGlu_str<br>+ 1.0 NADP_str + 1.0<br>glutamate-1-semialdehyde_str<br><> 1.0 NADPH_str + 1.0<br>tRNA-Glu_str  | glutamyl-tRNA<br>reductase (GluTR)                                | 1.2.1.70 | LOC_Os10g35840.1                      |
| chl_RXN7660               | 1.0 NADPH_str + 1.0<br>geranylgeranyl-<br>diphosphate_str <> 1.0 phytyl-<br>diphosphate_str + 1.0<br>NADP_str                 | geranyl geranyl<br>reductase                                      | 1.3.1.83 | LOC_Os02g51080.1                      |
| chl_PORPHOBILSY<br>NTHRXN | 2.0 5-AMINO-<br>LEVULINATE_str -> 1.0<br>PORPHOBILINOGEN_str                                                                  | delta-aminolevulinic<br>acid dehydratase                          | 4.2.1.24 | LOC_Os06g49110.1                      |
| chl_GSAAMINOTR<br>ANSRXN  | 1.0 GLUTAMATE-1-<br>SEMIALDEHYDE_str <> 1.0<br>5-AMINO-LEVULINATE_str                                                         | glutamate-1-<br>semialdehyde 2,1-<br>aminomutase                  | 5.4.3.8  | LOC_Os03g44150.1<br>,LOC_Os08g41990.1 |
| chl_TKL1                  | 1.0 GAP_str + 1.0 F6P_str <><br>1.0 X5P_str + 1.0 E4P_str                                                                     | transketolase                                                     | 2.2.1.1  | LOC_Os06g04270.1                      |
| chl_TKL2                  | 1.0 GAP_str + 1.0 F6P_str <><br>1.0 X5P_str + 1.0 E4P_str                                                                     | transketolase                                                     | 2.2.1.1  | LOC_Os06g04270.1                      |
| chl_27760RXN              | 1.0 CTP_str + 1.0 2-C-<br>METHYL-D-ERYTHRITOL-<br>4-PHOSPHATE_str <> 1.0 4-<br>CYTIDINE-5-DIPHOSPHO-<br>2-C_str + 1.0 PPI_str | 2-C-methyl-D-<br>erythritol 4-<br>phosphate<br>cytidyltransferase | 2.7.7.60 | LOC_Os01g66360                        |

|                |                              |                     |           |                    |
|----------------|------------------------------|---------------------|-----------|--------------------|
| chl_RXNMGPROT  | 1.0 S-                       | magnesium           | 2.1.1.11  | LOC_OS06G04150.1   |
| OPORPHYRINMET  | ADENOSYLMETHIONINE_          | protoporphyrin IX   |           |                    |
| HYLESTERSYN    | str + 1.0 MG-                | methyltransferase   |           |                    |
|                | PROTOPORPHYRIN_str ->        | (ChlM)              |           |                    |
|                | 1.0 MG-                      |                     |           |                    |
|                | PROTOPORPHYRIN-              |                     |           |                    |
|                | MONOMETHYL-ESTER_str         |                     |           |                    |
|                | + 1.0 ADENOSYL-HOMO-         |                     |           |                    |
|                | CYS_str                      |                     |           |                    |
| chl_RXN7659    | 1.0 NADPH_str + 1.0          | geranyl geranyl     | 1.3.1.83  | LOC_Os02g51080     |
|                | geranylgeranyl-              | reductase (chlP)    |           |                    |
|                | diphosphate_str <> 1.0       |                     |           |                    |
|                | NADP_str + 1.0 phytyl-       |                     |           |                    |
|                | diphosphate_str              |                     |           |                    |
| chl_RXN7658    | 1.0 NADPH_str + 1.0          | geranyl geranyl     | 1.3.1.83  | LOC_Os02g51080     |
|                | geranylgeranyl-              | reductase (chlP)    |           |                    |
|                | diphosphate_str <> 1.0       |                     |           |                    |
|                | NADP_str + 1.0 phytyl-       |                     |           |                    |
|                | diphosphate_str              |                     |           |                    |
| chl_CMPKIRXN   | 1.0 ATP_str + 1.0 CMP_str <> | cytidine            | 2.7.4.14  |                    |
|                | 1.0 ADP_str + 1.0 CDP_str    | monophosphate       |           |                    |
|                |                              | kinase              |           |                    |
| chl_DXPREDISOM | 1.0 NADP_str + 1.0 2-C-      | 1-deoxy-D-xylulose- | 1.1.1.267 | LOC_Os01g01710.1   |
| RXN            | METHYL-D-ERYTHRITOL-         | 5-phosphate         |           |                    |
|                | 4-PHOSPHATE_str <> 1.0       | reductoisomerase    |           |                    |
|                | DEOXYXYLULOSE-5P_str         | (DXR)               |           |                    |
|                | + 1.0 NADPH_str              |                     |           |                    |
| chl_GLUTAMINES | 1.0 ATP_str + 1.0 GLT_str +  | glutamine           | 6.3.1.2   | LOC_Os03g12290.1 ; |
| YN             | 1.0 AMMONIA_str -> 1.0       | synthetase          |           | LOC_Os03g50490.1   |
|                | ADP_str + 1.0 GLN_str + 1.0  |                     |           |                    |
|                | Pi_str                       |                     |           |                    |

|                                     |                                                                                                                            |                                                                   |           |                                                                                                                                      |
|-------------------------------------|----------------------------------------------------------------------------------------------------------------------------|-------------------------------------------------------------------|-----------|--------------------------------------------------------------------------------------------------------------------------------------|
| chl_Ald2                            | 1.0 DHAP_str + 1.0 E4P_str<br><> 1.0 SBP_str                                                                               |                                                                   |           |                                                                                                                                      |
| chl_271148RXN                       | 1.0 ATP_str + 1.0 4-CYTIDINE-5-DIPHOSPHO-2-C_str <> 1.0 ADP_str + 1.0 2-PHOSPHO-4-CYTIDINE-5-DIPHOSPHO-2-C-MET_str         | 4-(cytidine 5'-diphospho)-2-C-methyl-D-erythritol kinase (CDPMEK) | 2.7.1.148 | LOC_Os01g58790                                                                                                                       |
| chl_RXN1F20                         | 1.0 ATP_str + 1.0 PROTOPORPHYRIN_IX_str -> 1.0 ADP_str + 1.0 MG-PROTOPORPHYRIN_str + 1.0 Pi_str                            | magnesium chelatase (ChlH)                                        | 6.6.1.1   | LOC_OS07G46310.1,LOC_OS08G31870.1, LOC_OS10G30580.1                                                                                  |
| chl_RXN01461                        | 1.0 O2_str + 1.0 COPROPORPHYRINOGEN_III_str <> 1.0 PROTOPORPHYRINOGEN_str + 2.0 CO2_str                                    | coproporphyrinogen III oxidase (CPO)                              | 1.3.3.3   | LOC_Os04g52130                                                                                                                       |
| chl_FARNESYLTRANSTRANSFERAS<br>ERXN | 1.0 farnesyl-diphosphate_str + 1.0 isopentenyl-diphosphate_str <> 1.0 geranylgeranyl-diphosphate_str + 1.0 diphosphate_str | geranylgeranyl diphosphate synthase                               | 2.5.1.29  | LOC_Os09g33930.1<br>,LOC_Os01g53600.1<br>,LOC_Os07g39270.1<br>,LOC_Os02g44780.1 ,<br>LOC_Os01g14630.1                                |
| chl_SBPase                          | 1.0 SBP_str -> 1.0 S7P_str + 1.0 Pi_str                                                                                    | sedoheptulose-bisphosphatase                                      | 3.1.3.37  |                                                                                                                                      |
| chl_ADENYLKINRXN                    | 1.0 AMP_str + 1.0 ATP_str <> 2.0 ADP_str                                                                                   | adenylate kinase                                                  | 2.7.4.3   | LOC_Os08g19140.1<br>,LOC_Os08g02540.1<br>,LOC_Os08g01770.1,LOC_Os07g43170.1 , LOC_Os06g10200.1<br>,LOC_Os06g02000.1,LOC_Os04g57540.1 |

|                         |                                                                                                                                                           |                                          |            |                                                                                                                                                       |                                                                           |
|-------------------------|-----------------------------------------------------------------------------------------------------------------------------------------------------------|------------------------------------------|------------|-------------------------------------------------------------------------------------------------------------------------------------------------------|---------------------------------------------------------------------------|
|                         |                                                                                                                                                           |                                          |            |                                                                                                                                                       | ,LOC_Os04g01530.1,LOC_Os03g03820.1 ,<br>LOC_Os02g53790.1,LOC_Os12g13380.1 |
| chl_UROGENIIISY<br>NRXN | 1.0<br>HYDROXYMETHYLBILAN<br>E_str -> 1.0<br>UROPORPHYRINOGEN-<br>III_str                                                                                 | uroporphyrinogen<br>III synthase         | 4.2.1.75   | LOC_Os03g08730.1                                                                                                                                      |                                                                           |
| chl_PGK                 | 1.0 ATP_str + 1.0 PGA_str <><br>1.0 ADP_str + 1.0 BPGA_str                                                                                                | phosphoglycerate<br>kinase               | 2.7.2.3    | LOC_Os06g45710.1 ,<br>LOC_Os05g41640.1<br>,LOC_Os02g07260.1,LOC_Os06g45710.1                                                                          |                                                                           |
| chl_Rubisco             | 1.0 RuBP_str + 1.0 CO2_str -<br>> 2.0 PGA_str                                                                                                             | Ribulose-<br>bisphosphate<br>carboxylase | 4.1.1.39   | LOC_Os01g58020,LOC_Os10g21268,LOC_Os12g10580,LOC_Os11g32770,LOC_Os05g35330,LOC_Os02g05830,LOC_Os12g17600,LOC_Os12g19381,LOC_Os12g19470,LOC_Os09g24530 |                                                                           |
| chl_RXN5282             | 1.0 MG-<br>PROTOPORPHYRIN-<br>MONOMETHYL-ESTER_str<br>+ 1.0 NADPH_str + 1.0<br>O2_str -> 1.0 NADP_str + 1.0<br>13-HYDROXY-<br>MAGNESIUM-<br>PROTOPORP_str | MgPME cyclase                            | 1.14.13.81 | LOC_Os01g17170                                                                                                                                        |                                                                           |
| chl_RXN5283             | 1.0 MG-<br>PROTOPORPHYRIN-<br>MONOMETHYL-ESTER_str<br>+ 1.0 NADPH_str + 1.0                                                                               | MgPME cyclase                            | 1.14.13.81 | LOC_Os01g17170                                                                                                                                        |                                                                           |

|                 |                                                                                                                                                           |                                                   |            |                                                                                                                                                                                                                                                                                                        |
|-----------------|-----------------------------------------------------------------------------------------------------------------------------------------------------------|---------------------------------------------------|------------|--------------------------------------------------------------------------------------------------------------------------------------------------------------------------------------------------------------------------------------------------------------------------------------------------------|
|                 | O2_str -> 1.0 NADP_str + 1.0<br>13-HYDROXY-<br>MAGNESIUM-<br>PROTOPORP_str                                                                                |                                                   |            |                                                                                                                                                                                                                                                                                                        |
| chl_RXN5284     | 1.0 MG-<br>PROTOPORPHYRIN-<br>MONOMETHYL-ESTER_str<br>+ 1.0 NADPH_str + 1.0<br>O2_str -> 1.0 NADP_str + 1.0<br>13-HYDROXY-<br>MAGNESIUM-<br>PROTOPORP_str | MgPME cyclase                                     | 1.14.13.81 | LOC_Os01g17170                                                                                                                                                                                                                                                                                         |
| chl_GPPSYNRXN   | 1.0 dimethylallyl<br>diphosphate_str + 1.0 delta(3)-<br>isopentenyl-pp_str -> 1.0<br>PPI_str + 1.0 geranyl-<br>diphosphate_str                            | Dimethylallyltranstr<br>ansferase/GPP<br>synthase | 2.5.1.1    | LOC_Os12g17320.1<br>,LOC_Os12g08070.1,LOC_Os08g2<br>9970.1,LOC_Os08g29910.1,LOC_<br>Os08g23320.1,LOC_Os08g09370.1<br>,LOC_Os06g46450.1,LOC_Os05g5<br>0550.1,LOC_Os05g23950.1,<br>LOC_Os04g14190.1,<br>LOC_Os04g14110.1,LOC_Os03g09<br>060.1,LOC_Os02g39290.1,<br>LOC_Os01g50050.1,<br>LOC_Os01g50760.1 |
| mit_AconDHatase | 1.0 Citrate <> 1.0<br>CisAconitate                                                                                                                        | aconitate hydratase                               | 4.2.1.3    | LOC_Os06g19960,LOC_Os08g092<br>00,LOC_Os03g04410                                                                                                                                                                                                                                                       |
| mit_IsoCitDH    | 1.0 NAD_mit + 1.0 IsoCitrate<br>-> 1.0 NAD_mitH + 1.0<br>mit_CO2 + 1.0 AlphaKG                                                                            | Isocitrate<br>dehydrogenase                       | 1.1.1.42   | LOC_Os01g46610.1,<br>LOC_Os01g14580.1,LOC_Os05g4<br>9760.1, LOC_Os04g42920.1                                                                                                                                                                                                                           |
| mit_GCVMULTI    | 1.0 NAD_mit + 1.0 mit_GLY<br>+ 1.0 mit_THF <> 1.0<br>NAD_mitH + 1.0 mit_CO2 +                                                                             | glycine<br>decarboxylase<br>(GDC)                 | 1.4.4.2    | LOC_Os06g45670.1;<br>LOC_Os06g45670.1;<br>LOC_Os06g45670.                                                                                                                                                                                                                                              |

|                                 |                                                                                     |                                                                                        |          |                                                                               |
|---------------------------------|-------------------------------------------------------------------------------------|----------------------------------------------------------------------------------------|----------|-------------------------------------------------------------------------------|
|                                 | 1.0 mit_AMMONIA + 1.0<br>mit_METHYLENE-THF                                          |                                                                                        |          |                                                                               |
| mit_AconHydr                    | 1.0 CisAconitate <> 1.0<br>IsoCitrate                                               | aconitate hydratase                                                                    | 4.2.1.3  | LOC_Os06g19960,LOC_Os08g092<br>00,LOC_Os03g04410                              |
| mit_GLYOHMETR<br>ANS            | 1.0 mit_GLY + 1.0<br>mit_METHYLENE-THF <><br>1.0 mit_THF + 1.0 mit_SER              | 5,10-<br>methylenetetrahydro<br>folate:glycine<br>hydroxymethyltransf<br>erase (SHMT)  | 2.1.2.1  | LOC_Os03g52840.1,LOC_Os05g3<br>5440.1,LOC_Os11g26860                          |
| RXN0-5114                       | 1.0 3-P-SERINE <> 1.0 Pi +<br>1.0 SER                                               | 3-phosphoserine<br>phosphatase                                                         | 3.1.3.3  | LOC_Os11g41160.1 ,LOC_Os12g3<br>1820.1                                        |
| PSERTRANSAM-<br>RXN             | 1.0 3-P-SERINE + 1.0 2-<br>KETOGLUTARATE <> 1.0<br>3-P-HYDROXYPYRUVATE<br>+ 1.0 GLT | phosphoserine<br>transaminase                                                          | 2.6.1.52 | LOC_Os03g06200.1                                                              |
| HOMOCYSMETB1<br>2-RXN           | 1.0 HOMO-CYS + 1.0 5-<br>METHYL-THF -> 1.0 THF +<br>1.0 MET                         | 5-<br>methyltetrahydropte<br>royltriglutamate-<br>homocysteine S-<br>methyltransferase | 2.1.1.14 | LOC_Os03g63330.1                                                              |
| PGLYCDEHYDRO<br>G-RXN           | 1.0 G3P + 1.0 NAD <> 1.0 3-<br>P-HYDROXYPYRUVATE +<br>1.0 NADH                      | D-3-<br>phosphoglycerate<br>dehydrogenase                                              | 1.1.1.95 | LOC_Os07g15970.1 ,LOC_Os08g3<br>4720.1 ,LOC_Os06g44460.1<br>,LOC_Os04g55720.1 |
| GLYOHMETRANS-<br>RXN            | Gly + Methylene-THF <><br>THF + Ser                                                 | 5,10-<br>methylenetetrahydro<br>folate:glycine<br>hydroxymethyltransf<br>erase         | 2.1.2.1  | LOC_Os03g52840.1,LOC_Os05g3<br>5440.1,LOC_Os11g26860                          |
| ATP-CITRATE-<br>(PRO-S-)-LYASE- | 1.0 Pi + 1.0<br>OXALACETIC_ACID + 1.0                                               | ATP-citrate lyase                                                                      | 2.3.3.8  | LOC_Os01g19450                                                                |



|                                    |                                                                           |                                                                       |          |                                                                                                                           |  |
|------------------------------------|---------------------------------------------------------------------------|-----------------------------------------------------------------------|----------|---------------------------------------------------------------------------------------------------------------------------|--|
| RXN                                | ACETYL-COA + 1.0 ADP -><br>1.0 CO-A + 1.0 ATP + 1.0 CIT                   |                                                                       |          |                                                                                                                           |  |
| ADENOSYLHOMO<br>CYSTEINASE-RXN     | 1.0 ADENOSYL-HOMO-<br>CYS <> 1.0 HOMO-CYS +<br>1.0 ADENOSINE              | adenosylhomocystei<br>nase                                            | 3.3.1.1  | LOC_Os11g26850.1 ,,<br>LOC_Os04g46450.1                                                                                   |  |
| S-ADENMETSYN-<br>RXN               | 1.0 MET + 1.0 ATP -> 1.0 PPI<br>+ 1.0 Pi + 1.0 S-<br>ADENOSYLMETHIONINE   | S-<br>adenosylmethionine<br>synthetase                                | 2.5.1.6  | LOC_Os07g29440.1 ,LOC_Os05g0<br>4510.1 ,LOC_Os01g10940.1                                                                  |  |
| ACETATE--COA-<br>LIGASE-RXN        | 1.0 CO-A + 1.0 ATP + 1.0<br>ACET -> 1.0 AMP + 1.0 PPI<br>+ 1.0 ACETYL-COA | acetate-CoA ligase                                                    | 6.2.1.1  | LOC_Os02g32490.1,<br>LOC_Os04g33190.1                                                                                     |  |
| PYRUVATE-<br>DECARBOXYLAS<br>E-RXN | 1.0 PYRUVATE -> 1.0<br>CARBON-DIOXIDE + 1.0<br>ACETALD                    | Indole-3-pyruvic<br>acid decarboxylase                                | 4.1.1.1  | LOC_Os03g18220.1,<br>LOC_Os05g39320.1,<br>LOC_Os05g39310.1,<br>LOC_Os07g49250.1                                           |  |
| 2PGADEHYDRAT-<br>RXN               | 1.0 2-PG <> 1.0 PHOSPHO-<br>ENOL-PYRUVATE                                 | phosphopyruvate<br>hydratase                                          | 4.2.1.11 | LOC_Os10g08550.1,<br>LOC_Os06g04510.1,<br>LOC_Os03g14450.1                                                                |  |
| MALATE-DEH-<br>RXN                 | 1.0 MAL + 1.0 NAD <> 1.0<br>NADH + 1.0<br>OXALACETIC_ACID                 | Malate<br>dehydrogenase                                               | 1.1.1.37 | LOC_Os12g43630.1,<br>LOC_Os10g33800.1,<br>LOC_Os08g33720.1,<br>LOC_Os01g61380.1,<br>LOC_Os01g46070.1,<br>LOC_Os04g46560.1 |  |
| 3PGAREARR-RXN                      | 1.0 G3P <> 1.0 2-PG                                                       | 2,3bisphosphoglycer<br>-ate-independent<br>phosphoglycerate<br>mutase | 5.4.2.1  | LOC_Os05g40420.1,<br>LOC_Os03g21260.1,<br>LOC_Os01g60190.1,                                                               |  |
| ADENOSINE-<br>KINASE-RXN           | 1.0 ATP + 1.0 ADENOSINE -<br>> 1.0 AMP + 1.0 ADP                          | Adenosine kinase                                                      | 2.7.1.20 | LOC_Os06g12600.1,<br>LOC_Os04g43750.1,<br>LOC_Os02g41590.1                                                                |  |
| RXN66-3                            | 1.0 NAD + 1.0 ACETALD -><br>1.0 NADH + 1.0 ACET                           | Aldehyde<br>dehydrogenase                                             | 1.2.1.3  | LOC_Os02g43280.1<br>LOC_Os02g43194.1<br><br>LOC_Os04g45720.1<br>LOC_Os11g08300.1                                          |  |

|             |                                           |                                          |         |                  |
|-------------|-------------------------------------------|------------------------------------------|---------|------------------|
|             |                                           |                                          |         | LOC_Os07g48920.1 |
|             |                                           |                                          |         | LOC_Os02g07760.1 |
|             |                                           |                                          |         | LOC_Os01g40860.1 |
| 1.2.1.9-RXN | 1.0 NADP + 1.0 GAP -> 1.0 NADPH + 1.0 G3P | glyceraldehyde-3-phosphate dehydrogenase | 1.2.1.9 | LOC_Os03g03720.1 |

## transporters

mit\_AKG\_tx      1.0 2-KETOGLUTARATE <>  
1.0 AlphaKG

mit\_GLY\_tx      1.0 GLY <> 1.0 mit\_GLY

mit\_SER\_tx      1.0 SER <> 1.0 mit\_SER

mit\_Cit\_tx      1.0 CIT <> 1.0 Citrate

mit\_CO2\_tx      1.0 CARBON-DIOXIDE <>  
1.0 mit\_CO2

mit\_ammonia\_tx    1.0 mit\_AMMONIA -> 1.0 AMMONIA\_str

mit\_O2\_tx      1.0 OXYGEN-MOLECULE  
<> 1.0 mit\_O2

chl\_CO2\_tx      1.0 CARBON-DIOXIDE ->  
1.0 CO2\_str

chl\_MalGLT\_tx    1.0 GLT + 1.0 MAL\_str <>  
1.0 GLT\_str + 1.0 MAL

T2              1.0 ADENOSYL-HOMO-CYS\_str <> 1.0 ADENOSYL-HOMO-CYS

T1              1.0 S-ADENOSYLMETHIONINE

<> 1.0 S-  
 ADENOSYLMETHIONINE\_  
 str  
  
 chl\_Photon\_tx      x\_Photon -> 1.0 Photon  
  
 chl\_O2\_tx            1.0 OXYGEN-MOLECULE  
 <> 1.0 O2\_str  
  
 chl\_Mal2OG\_tx      1.0 MAL\_str + 1.0 2-  
 KETOGLUTARATE <> 1.0  
 2-KETOGLUTARATE\_str +  
 1.0 MAL  
  
 CO2\_tx              x\_CO2 <> 1.0 CARBON-  
 DIOXIDE  
  
 O2\_tx                x\_O2 <> 1.0 OXYGEN-  
 MOLECULE  
  
 CHL\_A\_tx            x\_CHLOROPHYLL-A <> 1.0  
 CHLOROPHYLL-A\_str

---

Chl, chloroplast; mit, mitochondria; tx, transporter; str, stroma; x\_, external metabolite; GLT, glutamate

(c) The additional essential reactions when photorespiration is involved.

| Reaction Name | Reaction                                                                                                   | Enzyme               | EC No.     | LOC            |
|---------------|------------------------------------------------------------------------------------------------------------|----------------------|------------|----------------|
| per_RXN969    | 1.0 per_OXYGEN-<br>MOLECULE + 1.0<br>per_GLYCOLLATE -><br>1.0 per_HYDROGEN-<br>PEROXIDE + 1.0<br>per_GLYOX | glycolate<br>oxidase | 1.1.3.15   | LOC_Os03g57220 |
| per_CATRXN    | 2.0 per_HYDROGEN-<br>PEROXIDE -> 1.0<br>per_OXYGEN-                                                        | catalase             | 1.11.1.6 , | LOC_Os02g02400 |

|                                      | MOLECULE              |               |              |                |
|--------------------------------------|-----------------------|---------------|--------------|----------------|
| per_MALATEDEHRXN                     | 1.0 per_MAL + 1.0     | malate        | 1.1.1.37     | LOC_Os12g43630 |
|                                      | per_NAD <> 1.0        | dehydrogenase |              |                |
|                                      | per_OXALACETIC_A      |               |              |                |
|                                      | CID + 1.0 per_NADH    |               |              |                |
| per_GLYCINEAMINOTRANSFERASERXN_total | 1.0 per_GLT + 1.0     |               |              |                |
|                                      | per_SER + 2.0         |               |              |                |
|                                      | per_GLYOX -> 1.0      |               |              |                |
|                                      | per_OH-PYR + 1.0      |               |              |                |
|                                      | per_2-                |               |              |                |
|                                      | KETOGLUTARATE +       |               |              |                |
|                                      | 2.0 per_GLY           |               |              |                |
| per_GLYCERATEDEHYDROGENASERXN        | 1.0 per_OH-PYR + 1.0  | hydroxypyruv  | 1.1.1.29/1.1 |                |
|                                      | per_NADH -> 1.0       | ate reductase | .1.81        |                |
|                                      | per_GLYCERATE +       |               |              |                |
|                                      | 1.0 per_NAD           |               |              |                |
| chl_GLY3KINRXN                       | 1.0 GLYCERATE_str +   |               |              |                |
|                                      | 1.0 ATP_str -> 1.0    |               |              |                |
|                                      | ADP_str + 1.0 PGA_str |               |              |                |
| chl_GPHRXN                           | 1.0 PGly_str -> 1.0   |               |              |                |
|                                      | GLYCOLLATE_str +      |               |              |                |
|                                      | 1.0 Pi_str            |               |              |                |
| ## transporters##                    |                       |               |              |                |
| per_Mal_tx                           | 1.0 MAL <> 1.0        |               |              |                |
|                                      | per_MAL               |               |              |                |
| per_GLYCERATE_tx                     | 1.0 GLYCERATE <>      |               |              |                |
|                                      | 1.0 per_GLYCERATE     |               |              |                |
| per_OAA_tx                           | 1.0                   |               |              |                |
|                                      | OXALACETIC_ACID       |               |              |                |
|                                      | <> 1.0                |               |              |                |

|                       |                                                           |
|-----------------------|-----------------------------------------------------------|
|                       | per_OXALACETIC_A<br>CID                                   |
| per_OXYGENMOLECULE_tx | 1.0 OXYGEN-<br>MOLECULE <> 1.0<br>per_OXYGEN-<br>MOLECULE |
| per_2KETOGLUTARATE_tx | 1.0 2-<br>KETOGLUTARATE<br><> 1.0 per_2-<br>KETOGLUTARATE |
| Per_GLT_tx            | 1.0 GLT <> 1.0<br>per_GLT                                 |
| chl_GLYCOLLATE_tx     | 1.0 per_GLYCOLLATE<br><> 1.0<br>GLYCOLLATE_str            |

---

Per, peroxisome; chl, chloroplast; tx, transporter; str, stroma

**Table S3.** List of enzymes known to be involved in chlorophyll synthesis.

---

| Enzyme                                                | EC No.   | Reference No. |
|-------------------------------------------------------|----------|---------------|
| protoporphyrinogen oxidase                            | 1.3.3.4  | 3             |
| hydroxymethylbilane synthase                          | 2.5.1.61 | 3             |
| divinyl chlorophyllide a 8-vinyl-reductase            | 1.3.1.75 | 3             |
| chlorophyll synthetase                                | 2.5.1.62 | 3             |
| 2-C-methyl-D-erythritol 2,4-cyclodiphosphate synthase | 4.6.1.12 | 8             |
| uroporphyrinogen decarboxylase                        | 4.1.1.37 | 3             |
| 1-deoxy-D-xylulose-5-phosphate synthase               | 2.2.1.7  | 8             |
| protochlorophyllide oxidoreductase                    | 1.3.1.33 | 35            |

|                                                                           |            |       |
|---------------------------------------------------------------------------|------------|-------|
| Glutamine-tRNA ligase/synthetase                                          | 6.1.1.17   | 3     |
| glutamyl-tRNA reductase                                                   | 1.2.1.70   | 35;3  |
| glutamate-1-semialdehyde 2,1-aminomutase                                  | 5.4.3.8    | 3     |
| magnesium protoporphyrin IX methyltransferase (ChlM)                      | 2.1.1.11   | 35    |
| geranyl geranyl reductase (chlP)                                          | 1.3.1.83   | 36    |
| 1-deoxy-D-xylulose-5-phosphate reductoisomerase                           | 1.1.1.267  | 8     |
| 4-(cytidine 5'-diphospho)-2-C-methyl-D-erythritol kinase                  | 2.7.1.148  | 8     |
| magnesium chelatase (chlH)                                                | 6.6.1.1    | 4; 35 |
| coproporphyrinogen III oxidase                                            | 1.3.3.3    | 35; 3 |
| uroporphyrinogen III synthase (UROS)                                      | 4.2.1.75   | 35;3  |
| <hr/>                                                                     |            |       |
| magnesium protoporphyrin IX monomethyl ester cyclase<br>(CHL27)           | 1.14.13.81 | 35    |
| Porphobilinogen synthase/ delta-aminolevulinic acid<br>dehydratase (ALAD) | 4.2.1.24   | 3     |

**Table S4.** List of chloroplastic, mitochondrial and peroxisomal transporters added.

| Compartment | Transporter       | Reaction                                               | Reference No. |
|-------------|-------------------|--------------------------------------------------------|---------------|
| Chloroplast | chl_Mal2OG_tx     | MAL_str + 2-KETOGLUTARATE <> 2-KETOGLUTARATE_str + MAL | 63            |
|             | chl_MalGLT_tx     | GLT_str + MAL <> MAL_str + GLT                         | 63            |
|             | chl_Gln_Glt_tx    | GLT + GLN_str <> GLN + GLT_str                         | 68            |
|             | chl_NITRATE_tx    | NITRATE <> NITRATE_str                                 |               |
|             | chl_GLYCOLLATE_tx | per_GLYCOLLATE <> GLYCOLLATE_str                       | 44            |
|             | Ammonia_tx        | x_ammonia -> Ammonia_str                               |               |

|              |                       |                                                               |                                           |
|--------------|-----------------------|---------------------------------------------------------------|-------------------------------------------|
|              |                       | S-ADENOSYLMETHIONINE <> S                                     | 33                                        |
|              |                       | ADENOSYLMETHIONINE_str                                        |                                           |
| T1           |                       |                                                               |                                           |
| T2           |                       | ADENOSYL-HOMO-CYS_str <> ADENOSYL-HOMO-                       | 33                                        |
|              |                       | CYS                                                           |                                           |
| Mitochondria | mit_ammonia_tx        | mit_AMMONIA -> AMMONIA_str                                    | 59                                        |
|              | mit_SER_tx            | SER <> mit_SER                                                | 64                                        |
|              | mit_GLY_tx            | GLY <> mit_GLY                                                | 64                                        |
|              | mit_GLY_o_tx          | per_GLY <> mit_GLY_o                                          | 44                                        |
|              | mit_SER_o_tx          | per_SER <> mit_SER_o                                          | 44                                        |
| Peroxisome   | per_OAA_tx            | per_OXALACETIC_ACID <> OXALACETIC_ACID                        | 44 for all<br>peroxisomal<br>transporters |
|              | per_GLYCERATE_tx      | GLYCERATE_str <> per_GLYCERATE                                |                                           |
|              | per_Mal_tx            | per_MAL <> MAL                                                |                                           |
|              | per_OHPYR_tx          | per_OH-PYR -> OH-PYR                                          |                                           |
|              | per_GLT_tx            | per_GLT <> GLT                                                |                                           |
|              | per_2KETOGLUTARATE_tx | per_2-KETOGLUTARATE <> 2-KETOGLUTARATE                        |                                           |
|              | per_LALPHAALANINE_tx  | per_L-ALPHA-ALANINE <> L-ALPHA-ALANINE                        |                                           |
|              | per_PYRUVATE_tx       | per_PYRUVATE <> PYRUVATE                                      |                                           |
|              | per_OXYGENMOLECULE_tx | per_OXYGEN-MOLECULE <> OXYGEN-MOLECULE                        |                                           |
|              | per_GLY_SER_o_tx      | 1.0 mit_SER_o + 2.0 per_GLY <> 1.0 per_SER + 2.0<br>mit_GLY_o |                                           |

Chl, Chloroplast; mit, Mitochondria; str, Stroma; tx, Transporter; per, Peroxisome; Glu kept as GLT in the model; 2OG kept as 2-KETOGLUTARATE in the model.



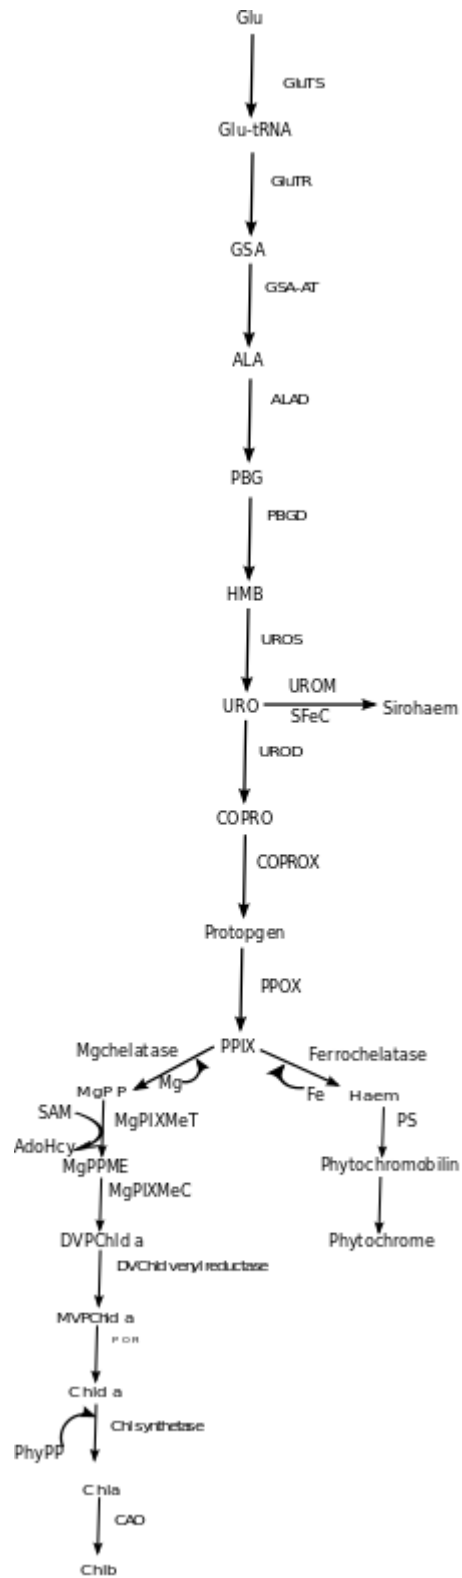

**Figure S1.** Overview of the chlorophyll biosynthesis pathway and the important steps and the key enzymes involved in it.

## Supporting legends

**Figure S1.** Overview of the chlorophyll biosynthesis pathway and the important steps and the key enzymes involved in it<sup>6</sup>. *Intermediates:* Glu, glutamate; Glu-tRNA, glutamyl tRNA; GSA, glutamate semialdehyde; ALA, 5-aminolevulinic acid; PBG, porphobilinogen; HMB, hydroxymethylbilane; URO, uroporphyrinogen III; COPRO, copro-porphyrinogen III; Protopgen, protoporphyrinogen; PPIX, protoporphyrin IX; MgPP, Mg-protoporphyrin; MgPPME, Mg-protoporphyrinIX monomethyl ester; DVPchld a, divinyl protopchlorophyllide; MVPchld a, monovinyl protochlorophyllide; Chld a, chlorophyllide; Chla, chlorophyll a; Chlb, Chlorophyll b. *Enzymes:* GluTS, Glutamyl-TRNA synthetase; GluTR, Glutamyl-tRNA reductase; GSA AT, Glutamate-1-semialdehyde aminotransferase; ALAD, 5-aminolevulinic acid dehydratase; PBGD, porphobilinogen deaminase; UROS, uroporphyrinogen III synthase; UROM, Urogen III methylase; SFeC, serohaem iron chelatase; UROD, uroporphyrinogen III decarboxylase; COPROX, Coporphyrinogen III oxidase; PPOX, protoporphyrinogenIX oxidase; MgPIXMeT, Mg-protoporphyrin IX methyltransferase; MgPIXMEC, Mg-protoporphyrin IX monomethyl ester cyclase; DV chld Venyl reductase, divinyl chlorophyllide a 8-vinyl-reductase; POR, protochlorophyllide oxidoreductase; Chl synthetase; chlorophyll synthetase; PS, Phytychromobilin synthase; CAO, Chlorophyll a oxygenase.

## Supplementary Discussion S1

### Elucidating the complete biosynthesis pathway of chlorophyll

We previously mentioned that the existing literature on chlorophyll biosynthesis mainly focused on the pathway starting from Glu. However, from where does this Glu come from has not been explored. The fact that Glu is the start point for chlorophyll synthesis does indicate participation of many other reactions and compartments for chlorophyll synthesis, but it has not been well documented so far. We tried to decipher the interconnection between the source of Glu and some other intermediates in the chloroplast and the chlorophyll synthesis pathway with the central carbon and nitrogen metabolism. Our results showed that one of the possible chlorophyll biosynthesis pathways has 108 reactions and these are distributed among all the cellular compartments (Fig. 1).

8.0 unit of Glu in the chloroplast is needed for chlorophyll synthesis. Glu in the chloroplast forms ALA via an intermediate glutamate semialdehyde (GSA) which is catalyzed by glutamate-1-semialdehyde 2, 1-aminomutase (GSA-AT). The source of this chloroplastic Glu can be either ferredoxin dependent GOGAT (EC 1.4.7.1) or NADPH dependent GOGAT (EC 1.4.1.13). Our result showed the involvement of the NADPH dependent GOGAT (Fig. 1).

This GOGAT was linked with the chloroplastic Mal-Glu and Mal-2OG transporters. 2-oxoglutarate (2OG) from the cytosol enters into the chloroplast via chloroplastic Mal-2OG transporter and participates in Glu synthesis (EC 1.4.1.13) in the chloroplast. Glu in the chloroplast is produced from ammonia and Glu through glutamine synthase reaction (EC 6.3.1.2). In the chloroplast, one of the important steps of chlorophyll biosynthesis is the conversion of MgPP to MgPPME which is associated with SAM to AdoHcy conversion (Fig. 1). The source of the SAM as substrate within the chloroplast is the chloroplastic SAM-AdoHcy transporter (T1 and T2). The source of Glu in the cytosol is the chloroplastic Mal-Glu transporter. The cytosolic Glu and 3-P-Hydroxypyruvate produces 2OG and 3-Phosphoserine-Serine (3-P-Ser) (EC 2.6.1.52). 3-P-Ser further forms Ser and the reaction is catalyzed by 3-phosphoserine phosphatase (EC 3.1.3.3). The Ser so formed in the cytosol methylates the tetrahydrofolate (THF) and produces Gly and 5,10-methylenetetrahydrofolate (MethyleneTHF) (EC 2.1.2.1). MethyleneTHF consequently produces 5-methyltetrahydrofolate (5-MethylTHF) (EC 1.5.1.20). 5-MethylTHF with homocysteine (Hcy) produces THF and methionine (Met) (EC 2.1.1.14)<sup>32</sup>. Met is the precursor of SAM, which is an essential intermediate in chlorophyll synthesis. Met subsequently produces SAM in the cytosol. This series of reactions that form SAM in the cytosol is called the *methyl cycle*. The Gly so produced is transported to the mitochondrion via mitochondrial Gly transporter. The Hcy required for Met synthesis is produced from AdoHcy which is imported from the chloroplast via a transporter (T2, Fig. 1). Since plant chloroplast and mitochondria lack AdoHcy hydrolase<sup>32</sup>, so transport of AdoHcy from the chloroplast to the cytosol is required for methyl cycle to operate<sup>32</sup>. AdoHcy gets converted to Hcy releasing adenosine which with the help of ATP produces AMP and ADP. SAM formed

in the cytosol enters into the chloroplast via SAM transporter (T1, Fig. 1) where it is required for methylation of MgPP to MgPPME, an intermediate for chlorophyll biosynthesis (EC 2.1.1.11) and the produced AdoHcy is to be exported out into the cytosol. It has been reported that impairment of SAM transporter affects plastid biogenesis<sup>33</sup> and moreover lack of SAM synthetase in the chloroplast<sup>32</sup> implies the import of SAM into the chloroplast from the cytosol.

The cytosolic Mal can be transported to the chloroplast via Mal-OAA and Mal-Glu transporter (chloroplastic OAA and Glu are transported to cytosol). On the other hand, chloroplastic Mal can be transported to the cytosol via Mal-2OG transporter. Part of cytosolic OAA is converted to cytosolic citrate and this citrate is transported to the mitochondrion through mitochondrial transporter (Fig. 1).

2OG is also imported from the mitochondrion via 2OG transporter. 2OG is formed through a series of reactions from citrate to isocitrate via cisaconitate (EC 4.2.1.3) and finally to 2OG (EC 1.1.1.42). Gly that enters into the mitochondria combines with THF [catalyzed by glycine decarboxylase, GDC (EC 1.4.4.2)] and gives MethyleneTHF with release of ammonia and carbon-dioxide. Mitochondrial Gly is also involved in the biosynthesis of Ser by serine hydroxymethyltransferase (EC 2.1.2.1) and this Ser comes out of the mitochondrion via mitochondrial Ser transporter. Ser-Gly conversion forms a part of photorespiration as well as folate metabolism. It has been reported that Gly-Ser cycle is obligatory for one carbon metabolism that involves folate and methionine<sup>34</sup>. The mitochondrial ammonia released in GDC mediated reaction is transported into the chloroplast by a transporter where it participates in Gln synthesis from Glu (EC 6.3.1.2). The mitochondrial CO<sub>2</sub> gets released into the cytosol via mitochondrial CO<sub>2</sub> transporter and then gets transported into the chloroplast via chloroplastic CO<sub>2</sub> transporter. CO<sub>2</sub> is also released in three intermediate steps of chlorophyll synthesis (EC 4.1.1.37, 2.2.1.7, and 1.3.3.3). Major part of CO<sub>2</sub> gets involved in Rubisco catalyzed reaction and the remaining gets utilized for synthesis of malate from pyruvate. Light from the external environment (photon) is captured by the chloroplasts and is utilized in light non cyclic (found to be essential) and cyclic (not always) photophosphorylation reactions. Whereas the non-cyclic reaction produces O<sub>2</sub>, ATP and NADPH, the cyclic produces only ATP. In the chloroplast, the oxygen gets used up in four intermediate steps of chlorophyll synthesis (1.3.3.4 and 1.14.13.81). However, the major part of O<sub>2</sub> gets exported out of the chloroplast via a transporter and then it gets imported into the mitochondrion to get involved in the electron transport chain.

Clearly, our results indicated how various reactions from different organelles participate in chlorophyll synthesis in plants. More importantly, we observed that besides chloroplast, the other organelles, namely the mitochondria, cytosol and peroxisome (only under photorespiration) are also essentially required to complete the chlorophyll synthesis pathway. Various transporters and few antiporters were found to be required in order to complete the chlorophyll biosynthesis pathway (Fig. 1).
